# Supplementary material for: Boiling, Blanching, and Stir-Frying Markedly Reduce Pesticide Residues in Vegetables
Source: MDPI journal article supplement (doi:10.3390/foods11101463), 2022-05-18
Supplement: s1 [file s1]

**Supplementary Materials:** Standards of eighty-eight pesticides and two metabolites, namely 4,4'-DDD, 4,4'-DDE, 4,4'-DDT, alachlor, aldrin,  $\alpha$ -endosulfan, atrazine, azinphos-ethyl, azoxystrobin,  $\gamma$ -BHC,  $\beta$ -endosulfan, bifenthrin, butachlor, captan, carbaryl, carbofuran (and its two metabolites carbofuran-3-hydroxy and carbofuran-3-keto), carbosulfan, chlordan, chlormefos, chlorothalonil, chlorpyrifos, chlorpyrifos-methyl, chlorthiophos, cyfluthrin,  $\lambda$ -cyhalothrin, cypermethrin, deltamethrin, diazinon, dichlorvos, dicofol, dicrotophos, difenoconazole, dimethoate, edrin, EPN, ethion, fenitrothion, fenobucarb, fenoxycarb, fenthion, fenvalerate, fipronil, flumethrin, flutolanil, folpet, heptachlor, hexaconazole, imidacloprid, indoxacarb, isoprocarb, malathion, mefenacet, mepronil, metalaxyl, methamidophos, methidathion, methiocarb, methomyl, mevinphos, monocrotophos, omethoate, oxyfluorfen, paraoxon-methyl, parathion-ethyl, parathion-methyl, phenthoate, phosalone, pirimicarb, pirimiphos-ethyl, pirimiphos-methyl, prochloraz, profenofos, promecarb, propargite, propiconazole, prothiofos, pyraclostrobin, pyridaben, quintozone, quizalofop-p-ethyl, tebuconazole, thiabendazole, permethrin, triazophos and trifloxystrobin were purchased from Dr. Ehrenstorfer (Augsburg, Germany).
